# Supplementary material
Source: PubMed Central journal article supplement (PMC8376851)
Supplement: S0899823X21003226sup001.pdf [file S0899823X21003226sup001.pdf]

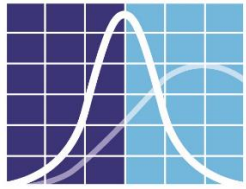

**SHEA**  
The Society for Healthcare  
Epidemiology of America

with AMDA, APIC, HIVMA, IDSA, PIDS, and SIDP

# Appendices: COVID-19 Vaccination as a Condition of Employment for Healthcare Personnel

## Contents

|                                                                                                                                                          |    |
|----------------------------------------------------------------------------------------------------------------------------------------------------------|----|
| Figure 1. Hierarchy of Controls .....                                                                                                                    | 2  |
| Table 1. Vaccine Efficacy and Real-World Effectiveness.....                                                                                              | 3  |
| Table 2. Summary of COVID-19 Side Effects Reported in Phase 3 Clinical Trials for Pfizer-BioNTech, Moderna, and Johnson & Johnson/Janssen Vaccines ..... | 6  |
| Table 3. Summary of Post-authorization Safety Monitoring Systems in the US for COVID-19 Vaccines .....                                                   | 7  |
| Table 4. Advantages of a Fully Vaccinated Workforce.....                                                                                                 | 8  |
| Table 5. Strategies to Increase Vaccination Rates .....                                                                                                  | 9  |
| References .....                                                                                                                                         | 11 |

Figure 1. Hierarchy of Controls

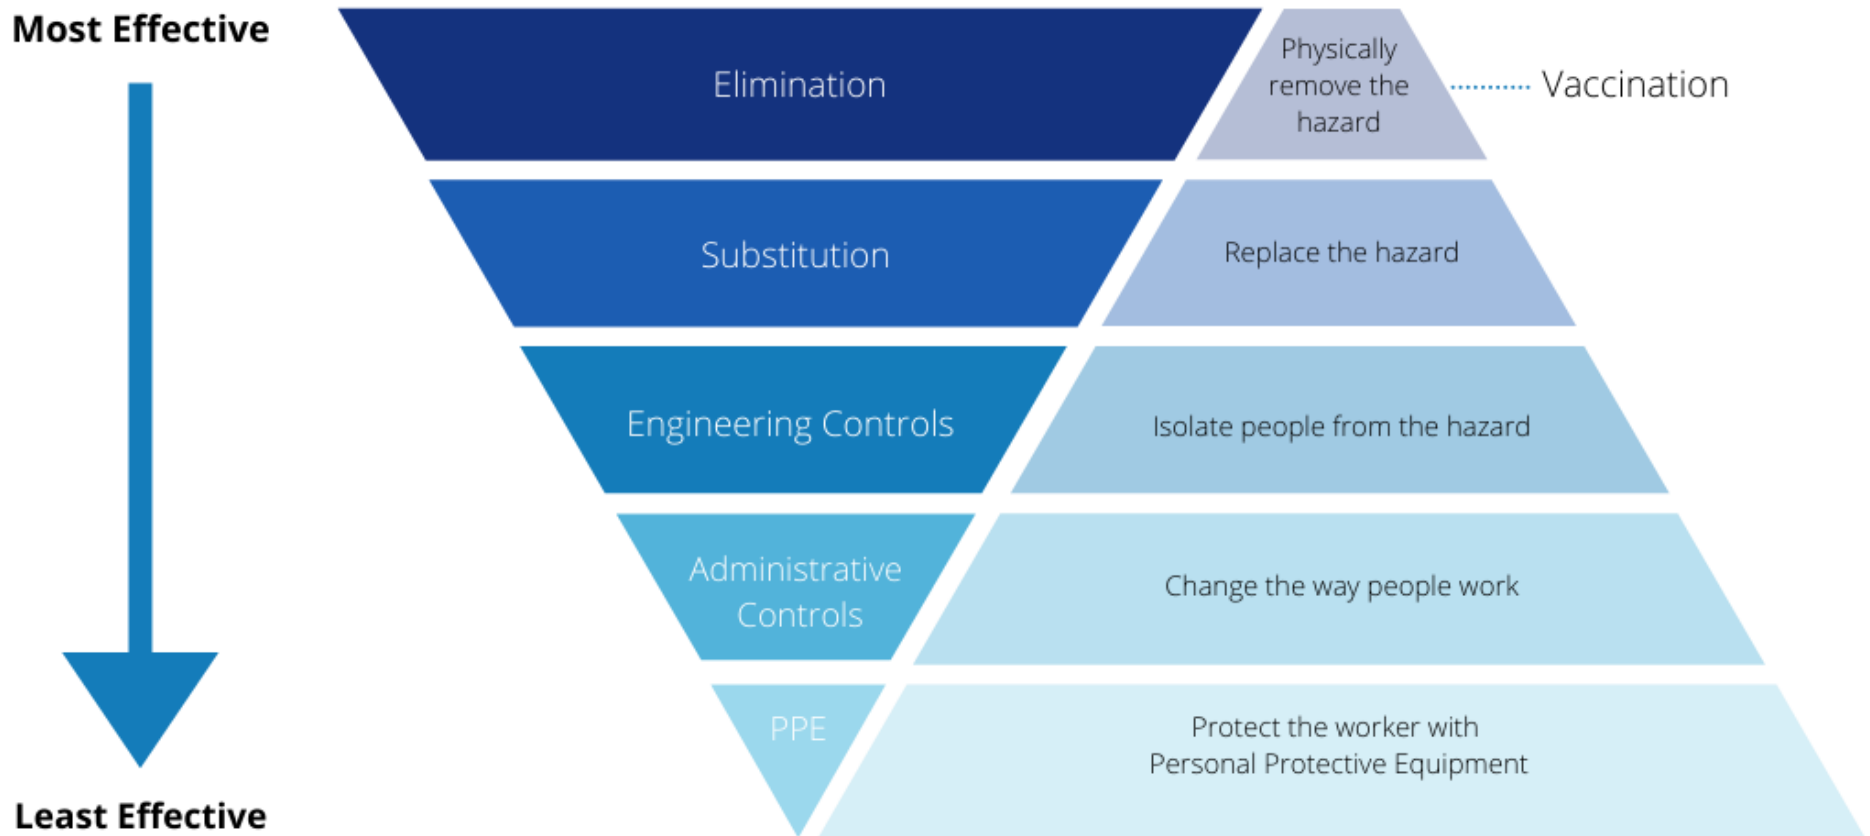

This graphic is adapted from the National Institute for Occupational Safety and Health (NIOSH) "[Hierarchy of Controls](#)" (1). As explained by NIOSH, the control methods that fall into the highest tier of the graphic are potentially more effective and protective than those that are lower. Following this hierarchy normally leads to the implementation of inherently safer systems, with reduction of illness and injury in workplaces.

Vaccines are an elimination method in the top tier and thus are highly effective at reducing risk of hazard to HCP.

Table 1. Vaccine Efficacy and Real-World Effectiveness

| Setting                                                                                                                                                                                                                                                                                                                                                                                                                                                                                                                                                                                                                                                                                                                                                                                                                                                                                                    | Outcome(s)                                                                                                                                                              | Vaccine Efficacy (95% confidence interval) <sup>a</sup>                                                                                                                                                                                           |
|------------------------------------------------------------------------------------------------------------------------------------------------------------------------------------------------------------------------------------------------------------------------------------------------------------------------------------------------------------------------------------------------------------------------------------------------------------------------------------------------------------------------------------------------------------------------------------------------------------------------------------------------------------------------------------------------------------------------------------------------------------------------------------------------------------------------------------------------------------------------------------------------------------|-------------------------------------------------------------------------------------------------------------------------------------------------------------------------|---------------------------------------------------------------------------------------------------------------------------------------------------------------------------------------------------------------------------------------------------|
| <b>Phase-3/4 Clinical Trials Experience</b>                                                                                                                                                                                                                                                                                                                                                                                                                                                                                                                                                                                                                                                                                                                                                                                                                                                                |                                                                                                                                                                         |                                                                                                                                                                                                                                                   |
| <b>mRNA Vaccines</b>                                                                                                                                                                                                                                                                                                                                                                                                                                                                                                                                                                                                                                                                                                                                                                                                                                                                                       |                                                                                                                                                                         |                                                                                                                                                                                                                                                   |
| <b>BNT162b2 (Pfizer)</b>                                                                                                                                                                                                                                                                                                                                                                                                                                                                                                                                                                                                                                                                                                                                                                                                                                                                                   |                                                                                                                                                                         |                                                                                                                                                                                                                                                   |
| Polack (2)<br>Multinational randomized placebo-controlled trial<br><ul style="list-style-type: none"> <li>Symptomatic infection ≥7 days after dose 2 in persons ≥16 years of age</li> <li>No significant difference in VE by age, gender, race/ethnicity, BMI, coexisting conditions</li> <li>Only one case in vaccinated, 4 cases in placebo group (vaccine efficacy 75% [95% CI -152.6-99.5])</li> </ul>                                                                                                                                                                                                                                                                                                                                                                                                                                                                                                 | <ol style="list-style-type: none"> <li>Symptomatic Infection</li> <li>Severe Disease, Hospitalization, Death</li> <li>Asymptomatic Infection</li> </ol>                 | <ol style="list-style-type: none"> <li>95% (90.3-97.6%)</li> <li>75% (-152.6-99.5%)</li> <li>Not assessed</li> </ol>                                                                                                                              |
| <b>mRNA-1273 (Moderna)</b>                                                                                                                                                                                                                                                                                                                                                                                                                                                                                                                                                                                                                                                                                                                                                                                                                                                                                 |                                                                                                                                                                         |                                                                                                                                                                                                                                                   |
| Baden (3)<br>US multisite randomized, stratified, placebo-controlled trial<br><ul style="list-style-type: none"> <li>Symptomatic infection ≥14 days after dose 2 in persons age &gt;18 years of age</li> <li>30 (including one death) in placebo group, none in vaccine group</li> </ul>                                                                                                                                                                                                                                                                                                                                                                                                                                                                                                                                                                                                                   | <ol style="list-style-type: none"> <li>Symptomatic Infection</li> <li>Severe Disease, Hospitalization, Death</li> <li>Asymptomatic Infection</li> </ol>                 | <ol style="list-style-type: none"> <li>94.1% (89.3-96.8%)</li> <li>100%</li> <li>Not assessed</li> </ol>                                                                                                                                          |
| <b>Viral Vector Vaccines</b>                                                                                                                                                                                                                                                                                                                                                                                                                                                                                                                                                                                                                                                                                                                                                                                                                                                                               |                                                                                                                                                                         |                                                                                                                                                                                                                                                   |
| <b>Ad26.COVS.2.S (J&amp;J)</b>                                                                                                                                                                                                                                                                                                                                                                                                                                                                                                                                                                                                                                                                                                                                                                                                                                                                             |                                                                                                                                                                         |                                                                                                                                                                                                                                                   |
| Sadoff (4)<br>Multinational (US, South Africa, Brazil, Chile, Argentina, Colombia, Peru, Mexico) randomized, placebo-controlled trial<br><ul style="list-style-type: none"> <li>Symptomatic infection ≥14 days and ≥28 days after dose in persons ≥18 years of age</li> <li>Similar efficacy across age, gender, race/ethnicity, comorbidities</li> <li>Severe disease, hospitalization, or death ≥14 days after vaccine administration: <ul style="list-style-type: none"> <li>5 COVID-19-related deaths in placebo group</li> <li>None in vaccine group</li> </ul> </li> <li>Asymptomatic infection: <ul style="list-style-type: none"> <li>Based on subset with SARS-CoV-2 serology results 71 days after vaccination, 0.7% of vaccine recipients had no symptoms of COVID-19 but had documented seroconversion to a non-spike protein compared with 2.8% of placebo recipients.</li> </ul> </li> </ul> | <ol style="list-style-type: none"> <li>Symptomatic Infection</li> <li>Severe Disease</li> <li>Hospitalization</li> <li>Death</li> <li>Asymptomatic infection</li> </ol> | <ol style="list-style-type: none"> <li><i>Global:</i> at ≥14 days: 66.9% (59.1-73.4%)<br/><i>US:</i> at ≥14 days: 74.4% (65.0-81.6%)</li> <li>76.7% (54.6-89.1%)</li> <li>93.1% (72.7-99.2%)</li> <li>100%</li> <li>65.5% (39.9-81.1%)</li> </ol> |
| <b>Real-world Experience / Vaccine Effectiveness Studies</b>                                                                                                                                                                                                                                                                                                                                                                                                                                                                                                                                                                                                                                                                                                                                                                                                                                               |                                                                                                                                                                         |                                                                                                                                                                                                                                                   |
| <b>Healthcare Personnel (HCP)</b>                                                                                                                                                                                                                                                                                                                                                                                                                                                                                                                                                                                                                                                                                                                                                                                                                                                                          |                                                                                                                                                                         |                                                                                                                                                                                                                                                   |
| <b>mRNA Vaccines</b>                                                                                                                                                                                                                                                                                                                                                                                                                                                                                                                                                                                                                                                                                                                                                                                                                                                                                       |                                                                                                                                                                         |                                                                                                                                                                                                                                                   |
| <b>BNT162b2 (Pfizer)</b>                                                                                                                                                                                                                                                                                                                                                                                                                                                                                                                                                                                                                                                                                                                                                                                                                                                                                   |                                                                                                                                                                         |                                                                                                                                                                                                                                                   |
| Tang (5)<br>US; HCP at St Jude Children’s Research Hospital: ≥7 days after dose 2                                                                                                                                                                                                                                                                                                                                                                                                                                                                                                                                                                                                                                                                                                                                                                                                                          | <ol style="list-style-type: none"> <li>Asymptomatic or Symptomatic<sup>a</sup></li> <li>Asymptomatic</li> <li>Symptomatic or after known exposure</li> </ol>            | <ol style="list-style-type: none"> <li>96% (91-98%)</li> <li>90% (78-96%)</li> <li>100% (N/A)</li> </ol>                                                                                                                                          |
| Angel (6)<br>Israel; HCP at a tertiary medical center in Tel Aviv: ≥7 days after dose 2                                                                                                                                                                                                                                                                                                                                                                                                                                                                                                                                                                                                                                                                                                                                                                                                                    | <ol style="list-style-type: none"> <li>Symptomatic</li> <li>Asymptomatic</li> </ol>                                                                                     | <ol style="list-style-type: none"> <li>98% (93-100%)</li> <li>91% (75-97%)</li> </ol>                                                                                                                                                             |
| Hall (7)<br>England; HCP in publicly funded hospitals: ≥7 days after dose 2.                                                                                                                                                                                                                                                                                                                                                                                                                                                                                                                                                                                                                                                                                                                                                                                                                               | <ol style="list-style-type: none"> <li>Asymptomatic or Symptomatic</li> </ol>                                                                                           | <ol style="list-style-type: none"> <li>86% (76-97%)</li> </ol>                                                                                                                                                                                    |
| Swift (8)<br>US: HCP at Mayo Clinic Health System: >14 days after dose 2.                                                                                                                                                                                                                                                                                                                                                                                                                                                                                                                                                                                                                                                                                                                                                                                                                                  | <ol style="list-style-type: none"> <li>Asymptomatic or Symptomatic</li> </ol>                                                                                           | <ol style="list-style-type: none"> <li>96.8% (95.3-97.8%)</li> </ol>                                                                                                                                                                              |
| Keehner (9)<br>US: HCP at University of California, San Diego and the University of California, Los Angeles health systems: >14 days after dose 2.                                                                                                                                                                                                                                                                                                                                                                                                                                                                                                                                                                                                                                                                                                                                                         | <ol style="list-style-type: none"> <li>Asymptomatic or Symptomatic</li> </ol>                                                                                           | <ol style="list-style-type: none"> <li>Absolute risk of testing positive after vaccination was 1.19%</li> </ol>                                                                                                                                   |

|                                                                                                                                                          |                                                                                                                                             |                                                                                                                                                |
|----------------------------------------------------------------------------------------------------------------------------------------------------------|---------------------------------------------------------------------------------------------------------------------------------------------|------------------------------------------------------------------------------------------------------------------------------------------------|
|                                                                                                                                                          |                                                                                                                                             | among HCP at UCSD and 0.97% among HCP at UCLA                                                                                                  |
| Fabiani (10)<br>Italy: HCP, Treviso province, Veneto region: ≥7 days after dose 2.                                                                       | 1. Asymptomatic or Symptomatic<br>2. Symptomatic                                                                                            | 1. 95.1% (62.4-99.4%)<br>2. 93.7% (50.8-99.2%)                                                                                                 |
| mRNA-1273 (Moderna)                                                                                                                                      |                                                                                                                                             |                                                                                                                                                |
| Swift (8)<br>US: HCP at Mayo Clinic Health System: >14 days after dose 2.                                                                                | 1. Asymptomatic or Symptomatic                                                                                                              | 1. 98.6% (90-100%)                                                                                                                             |
| <b>Either mRNA Vaccine</b>                                                                                                                               |                                                                                                                                             |                                                                                                                                                |
| Daniel (11)<br>US: HCP at the University of Texas Southwestern Medical Center: BNT162b2 vaccine ≥7 days after dose 2 or mRNA-1273 ≥14 days after dose 2. | 1. Asymptomatic or Symptomatic                                                                                                              | 1. <i>Non-vaccinated employees:</i> (2.61%; 2.29-2.96)<br><i>Vaccinated employees:</i> (0.05%; 0.01-0.13)                                      |
| Thompson (12)<br>US: HCP, first responders, and other essential and frontline workers in 8 cities: ≥14 days after dose 2.                                | 1. Asymptomatic or Symptomatic                                                                                                              | 1. 90% (68-97%)                                                                                                                                |
| Pilishvili (13)<br>US: HCP in 33 sites (interim analysis): ≥7 days after dose 2.                                                                         | 1. Symptomatic                                                                                                                              | 1. 93.5% (86.5-96.9%)                                                                                                                          |
| <b>Population-wide Surveillance</b>                                                                                                                      |                                                                                                                                             |                                                                                                                                                |
| <b>mRNA Vaccines</b>                                                                                                                                     |                                                                                                                                             |                                                                                                                                                |
| BNT162b2 (Pfizer)                                                                                                                                        |                                                                                                                                             |                                                                                                                                                |
| Haas (14)<br>Israel; national surveillance data in residents of Israel 16 years and older: ≥7 days after dose 2.                                         | 1. Asymptomatic or Symptomatic<br>2. Asymptomatic<br>3. Symptomatic<br>4. Hospitalization<br>5. Severe/Critical Hospitalization<br>6. Death | 1. 95.3% (94.9–95.7%)<br>2. 91.5% (90.7-92.2%)<br>3. 97% (96.7-97.2%)<br>4. 97.2% (96.8–97.5%)<br>5. 97.5% (97.1–97.8%)<br>6. 96.7% (96–97.3%) |
| Dagan (15)<br>Israel; data from subjects 16 years and older from Clalit Health Services, large integrated healthcare organization: ≥7 days after dose 2. | 1. Asymptomatic or Symptomatic<br>2. Symptomatic<br>3. Hospitalization<br>4. Severe disease                                                 | 1. 92% (88–95%)<br>2. 94% (87–98%)<br>3. 87% (55–100%)<br>4. 92% (75–100%)                                                                     |
| Chodick (16)<br>Israel; cohort study of members of a large health provider in Israel: 7 to 27 days after dose 2.                                         | 1. Asymptomatic or Symptomatic<br>2. Symptomatic                                                                                            | 1. 90% (79-95%)<br>2. 94% (88-97%)                                                                                                             |
| <b>Viral Vector Vaccines</b>                                                                                                                             |                                                                                                                                             |                                                                                                                                                |
| Ad26.COV2.S (J&J)                                                                                                                                        |                                                                                                                                             |                                                                                                                                                |
| Corchado-Garcia (17)<br>US; longitudinal data from Mayo Clinic health system: ≥15 days after dose.                                                       | 1. Asymptomatic or Symptomatic                                                                                                              | 1. 76.7% (30.3-95.3%)                                                                                                                          |
| <b>Elderly Individuals</b>                                                                                                                               |                                                                                                                                             |                                                                                                                                                |
| <b>mRNA Vaccines</b>                                                                                                                                     |                                                                                                                                             |                                                                                                                                                |
| BNT162b2 (Pfizer)                                                                                                                                        |                                                                                                                                             |                                                                                                                                                |
| Haas (14)<br>Israel; national surveillance data in residents of Israel 65 years and older: ≥7 days after dose 2.                                         | 1. Asymptomatic or Symptomatic<br>2. Asymptomatic<br>3. Symptomatic<br>4. Hospitalization<br>5. Severe/Critical Hospitalization<br>6. Death | 1. 95% (93.9–95.5%)<br>2. 88.5% (86.4–90.3%)<br>3. 96.4% (95.9–97%)<br>4. 96.8% (96.2–97.3%)<br>5. 97.3% (96.8–97.8%)<br>6. 96.9% (96–97.6%)   |
| Lopez Bernal (18)<br>Scotland; community surveillance of patients 70 years and older: ≥14 days after dose 2.                                             | 1. Symptomatic                                                                                                                              | 1. 80 years and older: 89% (85-93%)                                                                                                            |
| Chodick (16)<br>Israel; cohort study of members of a large health provider in Israel: 7 to 27 days after dose 2.                                         | 1. Asymptomatic or Symptomatic                                                                                                              | 1. <i>65-74 years:</i> 82% (63-92%)<br><i>75 years and older:</i> 82% (61-91%)                                                                 |

| <b>Either mRNA Vaccine</b>                                                                                                                                                      |                                                                  |                                                   |
|---------------------------------------------------------------------------------------------------------------------------------------------------------------------------------|------------------------------------------------------------------|---------------------------------------------------|
| Tenforde (19)<br>US; evaluation at 24 hospitals in 14 states of patients 65 years and older: ≥14 days after dose 2.                                                             | 1. Hospitalization                                               | 1. 94% (49-99%)                                   |
| <b>Nursing Homes – Congregate Settings</b>                                                                                                                                      |                                                                  |                                                   |
| <b>mRNA Vaccines</b>                                                                                                                                                            |                                                                  |                                                   |
| <b>BNT162b2 (Pfizer)</b>                                                                                                                                                        |                                                                  |                                                   |
| Britton (20)<br>US; residents of 2 skilled nursing facilities in Connecticut: ≥14 days after dose 1 through 14 days after dose 2.                                               | 1. Asymptomatic and Symptomatic                                  | 1. 60% (33-77%)                                   |
| Cavanaugh (21)<br>US; residents and workers of skilled nursing facility in Kentucky: ≥14 days after dose 2.                                                                     | 1. Symptomatic                                                   | 1. Residents 87% (66–95%)<br>Workers 87% (46-97%) |
| <b>Immunosuppressed Individuals</b>                                                                                                                                             |                                                                  |                                                   |
| <b>mRNA Vaccines</b>                                                                                                                                                            |                                                                  |                                                   |
| <b>BNT162b2 (Pfizer)</b>                                                                                                                                                        |                                                                  |                                                   |
| Chodick (16)<br>Israel; cohort study of members of a large health provider in Israel: 7 to 27 days after dose 2.                                                                | 1. Asymptomatic and Symptomatic<br>2. Symptomatic                | 1. 71% (37-87%)<br>2. 75% (44-88%)                |
| <b>Impact of Variant Status on Vaccine Efficacy</b>                                                                                                                             |                                                                  |                                                   |
| <b>mRNA Vaccines</b>                                                                                                                                                            |                                                                  |                                                   |
| <b>BNT162b 2 (Pfizer)</b>                                                                                                                                                       |                                                                  |                                                   |
| <b>Alpha (B.1.1.7)</b><br>Abu-Raddad (22)<br>Qatar; mass immunization campaign in Qatar. VE determined 2 weeks after dose 2.                                                    | 1. Documented Infection<br>2. Severe, Critical, or Fatal disease | 1. 90% (85.9-92.3%)<br>2. 100% (81.7–100%)        |
| <b>Alpha (B.1.1.7)</b><br>Sheikh (23)<br>Scotland; real-world population surveillance from Scotland. VE determined at least 2 weeks after dose 2.                               | 1. Documented infection                                          | 1. 92% (90-93%)                                   |
| <b>Beta (B.1.351)</b><br>Abu-Raddad (22)<br>Qatar; mass immunization campaign in Qatar. VE determined 2 weeks after dose 2.                                                     | 1. Documented Infection<br>2. Severe, Critical, or Fatal disease | 1. 75% (70.5-78.9%)<br>2. 100% (73.7–100%)        |
| <b>Delta (B.1617.2)</b><br>Sheikh (23)<br>Scotland; real-world population surveillance from Scotland. VE determined at least 2 weeks after dose 2.                              | 1. Documented infection                                          | 1. 79% (75-82%)                                   |
| <b>Viral Vector Vaccines</b>                                                                                                                                                    |                                                                  |                                                   |
| <b>Ad26.COV2.S (J&amp;J)</b>                                                                                                                                                    |                                                                  |                                                   |
| <b>Beta (B.1.351)</b><br>Sadoff (4)<br>Multinational; randomized, placebo-controlled trial data from South Africa, 95% cases from Beta (B.1.351) Infection ≥14 days after dose. | 1. Symptomatic Infection<br>2. Severe/Critical Disease           | 1. 52% (30.3-67.4%)<br>2. 73% (40–89.4%)          |
| <b>Zeta (P.2)</b><br>Sadoff (4)<br>Multinational; randomized, placebo-controlled trial data from Brazil, 69% cases from Zeta (P.2) Infection ≥14 days after dose.               | 1. Symptomatic Infection<br>2. Severe/Critical Disease           | 1. 66.2% (51-77.1%)<br>2. 81.9% (17-98.1%)        |

<sup>a</sup> Asymptomatic or Symptomatic: encompasses reported outcomes that do not distinguish vaccine efficacy between asymptomatic and symptomatic infections including outcomes labeled as any positive test or documented infection.

Table 2. Summary of COVID-19 Side Effects Reported in Phase 3 Clinical Trials for Pfizer-BioNTech, Moderna, and Johnson & Johnson/Janssen Vaccines

| Side Effect                | Pfizer-BioNtech (2)<br>% | Moderna (3)<br>% | J&J/Janssen (4)<br>% | Placebo (2-4)<br>% |
|----------------------------|--------------------------|------------------|----------------------|--------------------|
| Local (any)                | NR                       | 84-89            | 38-60                | 18-20*             |
| Pain                       | 66-83                    | 84-88            | 32-60                | 8-18               |
| Erythema                   | 5-7                      | 3-9              | 4-8                  | 0.4-1              |
|                            |                          |                  |                      |                    |
| Systemic (any)             | NR                       | 55-79            | 45-60                | 35-42*             |
| Fever ≥38° C               | 1-16                     | 1-16             | 2-10                 | 0-1                |
| Headache                   | 39-52                    | 33-59            | 32-42                | 14-34              |
| Fatigue                    | 34-59                    | 37-65            | 32-42                | 17-33              |
| Myalgia                    | 14-37                    | 23-58            | 28-38                | 5-15               |
| Serious AEs<br>(≥ grade 3) | 0.6                      | 1.5              | 0.4                  | 0.4-1.3            |

Note: Adverse events were reported slightly differently in each trial; some reported for entire study population, others had reactogenicity subset. Ranges include first versus second doses and/or younger versus older populations. Some data were only presented in graphical format; thus, exact percentages were not available. When available, numbers were rounded. The placebo column represents ranges from all 3 trials.

\*reported only for Moderna, J&J.

NR, not reported.

Table 3. Summary of Post-authorization Safety Monitoring Systems in the US for COVID-19 Vaccines

| Name of Safety Monitoring System                                                      | Type of Safety Surveillance   | Population(s) included                                                  | Major Strengths                                                                                                      | Major Weaknesses                                                                                                  |
|---------------------------------------------------------------------------------------|-------------------------------|-------------------------------------------------------------------------|----------------------------------------------------------------------------------------------------------------------|-------------------------------------------------------------------------------------------------------------------|
| CDC/FDA, <a href="#">Vaccine Adverse Event Reporting System (VAERS)</a>               | Passive                       | Entire US population                                                    | Early signal detection                                                                                               | Cannot determine causality                                                                                        |
| CDC, <a href="#">National Healthcare Safety Network (NHSN)</a>                        | Passive                       | 17,000 LTCF<br>Includes HCP                                             | Early signal detection<br>Directs VAERS reporting                                                                    | Aggregate voluntary reporting of doses administered and counts of non-specific AEs;<br>Cannot determine causality |
| DoD, Vaccine Adverse Event Clinical System (VAECS)                                    | Passive                       | Military                                                                | Early signal detection                                                                                               | Cannot determine causality                                                                                        |
| VA, <a href="#">Adverse Drug Event Reporting System (ADERS)</a>                       | Passive                       | VA HCP<br>8000 residents/day in VA LTCF                                 | Early signal detection                                                                                               | Cannot determine causality                                                                                        |
| CDC, <a href="#">Clinical Immunization Safety Assessment (CISA)</a>                   | Clinical consultation service | General population                                                      | Review of high-priority AEs of special interest and clinical questions                                               | Cannot determine causality                                                                                        |
| CDC, <a href="#">v-safe</a>                                                           | Active                        | All vaccine recipients with smartphones                                 | Early signal detection                                                                                               | Relies on recipients to sign up and complete surveys; recipients without smartphones cannot participate           |
| CDC, <a href="#">Vaccine Safety Datalink (VSD)</a>                                    | Linked database monitoring    | >12 million persons/year in 9 integrated health systems                 | Data refreshed weekly with weekly sequential analyses (RCA)                                                          | 1 to 2-week data lag (up to 6 weeks for hospitalized)                                                             |
| VA Electronic Health Record & Active Surveillance System                              | Linked database monitoring    | Veterans<br>8000 residents/day in VA LTCF                               | Data refreshed weekly with weekly sequential analyses (RCA)                                                          | ~1 week data lag (up to 4 weeks for hospitalized)                                                                 |
| FDA, <a href="#">Biologics Effectiveness and Safety (BEST) System</a>                 | Linked database monitoring    | Commercial & CMS medical/pharmacy databases, >100 million beneficiaries | Multiple partners, variety of healthcare settings                                                                    | 1 to 4-months data lag, depending on source                                                                       |
| FDA/CMS, Medicare data                                                                | Linked database monitoring    | 55-60 million (92% of US elderly)<br>Includes ~650K LTCF residents      | Data refreshed weekly with weekly sequential analyses (RCA)                                                          | CMS data lag ~4 weeks                                                                                             |
| FDA, Post-licensure Rapid Immunization Safety Monitoring (PRISM) program              | Linked database monitoring    | >70 million individuals/year, all 50 states represented                 |                                                                                                                      |                                                                                                                   |
| Genesis Healthcare (24)                                                               | Linked database monitoring    | LTCF residents in 284 Genesis long-term care facilities                 | Near real-time monitoring of adverse events and safety during rapid vaccine deployment in vulnerable LTCF population |                                                                                                                   |
| DoD, <a href="#">Electronic Health Record and Defense Medical Surveillance System</a> | Linked database monitoring    | Active duty/ Reserves/Guard personnel                                   |                                                                                                                      |                                                                                                                   |

CDC, Centers for Disease Control and Prevention. CMS, Centers for Medicare and Medicaid Services. DoD, Department of Defense. EMR, electronic medical record. FDA, Food and Drug Administration. LTCF, long-term care facilities. RCA, rapid cycle analysis. VA, Department of Veterans Affairs.

Table 4. Advantages of a Fully Vaccinated Workforce

| Domain                                                                                           | Description                                                                                                                                                                                                                                                                                                                                                                                                                                                                                                                                                                                                                                                                                                                                                                                                                                                                                                                            | References           |
|--------------------------------------------------------------------------------------------------|----------------------------------------------------------------------------------------------------------------------------------------------------------------------------------------------------------------------------------------------------------------------------------------------------------------------------------------------------------------------------------------------------------------------------------------------------------------------------------------------------------------------------------------------------------------------------------------------------------------------------------------------------------------------------------------------------------------------------------------------------------------------------------------------------------------------------------------------------------------------------------------------------------------------------------------|----------------------|
| <b>Reduced Risk of SARS-CoV-2 Transmission and Impact of Exposures on Vulnerable Populations</b> | <b>Reduce risk of transmission from HCP-to-HCP.</b> Risk of transmission from HCP-to-HCP has been associated with lack of masking both in healthcare facilities and in social gatherings outside of work.                                                                                                                                                                                                                                                                                                                                                                                                                                                                                                                                                                                                                                                                                                                              | (25-29)              |
|                                                                                                  | <b>Reduce risk of transmission from HCP-to-patient.</b> Risk of transmission from HCP-to-patient has been reported to be low, however, risk can be further reduced through reduction of infection in HCP, especially when patients are unable to mask or may remain at risk of infection despite being vaccinated (i.e., congregate care settings, including post-acute and long-term care, assisted living, and behavioral health settings as well as individuals with impaired response to vaccination due to immunocompromising conditions or to age-related immunosenescence).                                                                                                                                                                                                                                                                                                                                                     | (21, 30, 31)         |
|                                                                                                  | <b>Reduce risk of patient-to-HCP transmission.</b> Reported risk of exposure from an infected patient leading to HCP infection is low; however, this can be reduced further through vaccination of HCP.                                                                                                                                                                                                                                                                                                                                                                                                                                                                                                                                                                                                                                                                                                                                | (32)                 |
|                                                                                                  | <b>Reduce risk of within-household transmission.</b> Risk of transmission in households settings ranges from 10-50% of exposures. HCP who are fully vaccinated are less likely to become infected due to household exposure; they are also, if vaccinated less likely to become infected and transmit within the household.                                                                                                                                                                                                                                                                                                                                                                                                                                                                                                                                                                                                            | (30, 32-36)          |
|                                                                                                  | <b>Reduce incidence and impact of exposures.</b> For residents of post-acute and long-term care settings, the consequences of unvaccinated HCP extend beyond the risk of infection. Any new case of SARS-CoV-2 infection among HCP represents a potential. The response to an outbreak of SARS-CoV-2 in long-term care facilities includes suspending visitation until the affected unit in the nursing home has had 14 days without a new case of SARS-CoV-2 infection among residents or HCP. Visitation of family and friends for nursing homes residents has only recently resumed. A return to quarantine has profound negative consequences on the emotional well-being, cognitive function, and physical health of nursing home residents. Through vaccination, HCP working in long-term care settings mitigate the risk of both infection and exposure of frail elders who have suffered social isolation during the pandemic. | (37-39)              |
| <b>Promotion of HCP wellness and maintaining a healthy workplace</b>                             | <b>Prevention of morbidity and mortality among HCP.</b> COVID-19 among HCP has followed same trend as general population. HCP are essential workers, and during the pandemic, their role is critical. A reduction in workforce during a pandemic impacts all HCP, resulting in increased stress and increased work load, and decreased capacity to care for patients. Early data suggest decreased number of infections in HCP, beginning soon after the first dose of the two-dose series. Vaccination prevents COVID-19 infection and its long term sequelae.                                                                                                                                                                                                                                                                                                                                                                        | (6, 7, 9, 11, 40-45) |
|                                                                                                  | <b>Reduce the disruption in workforce.</b> Reduction in HCP infections and exposures can ensure sufficient staffing levels to support patient safety and HCP wellness. In the absence of fully vaccinated workforce, challenges with absenteeism and presenteeism will persist.                                                                                                                                                                                                                                                                                                                                                                                                                                                                                                                                                                                                                                                        | (46-50)              |
|                                                                                                  | <b>Return to pre-pandemic workplace social and professional interactions.</b> The CDC recently released guidance supporting unmasked and non-distanced interactions between fully vaccinated HCP in breakrooms and meetings however cautioned that if unvaccinated HCP are present, everyone should wear source control and unvaccinated HCP should physically distance from others.                                                                                                                                                                                                                                                                                                                                                                                                                                                                                                                                                   | (51)                 |
|                                                                                                  | <b>Decrease resource burden of exposure investigations and management.</b> A fully vaccinated healthcare workforce will have a reduced number of exposures from HCP-to-patient and thus reduce the resources required to identify exposed HCP and patients, refer for testing, and complete follow up.                                                                                                                                                                                                                                                                                                                                                                                                                                                                                                                                                                                                                                 | (52)                 |
|                                                                                                  | <b>HCP wellbeing.</b> HCP who are fully vaccinated have reported decreased mental stress after vaccination.                                                                                                                                                                                                                                                                                                                                                                                                                                                                                                                                                                                                                                                                                                                                                                                                                            | (53)                 |
| <b>Maintaining trust in HCP and healthcare institutions</b>                                      | <b>HCP vaccination can increase overall trust in vaccination.</b> HCP are trusted messengers and their role modeling of vaccination uptake can reduce vaccine hesitancy among patients.                                                                                                                                                                                                                                                                                                                                                                                                                                                                                                                                                                                                                                                                                                                                                | (54-56)              |
|                                                                                                  | <b>Affirmation of patient safety.</b> HCP and institutions that prioritize patient safety recognize vaccinations as important to preventing disease transmission.                                                                                                                                                                                                                                                                                                                                                                                                                                                                                                                                                                                                                                                                                                                                                                      | (57)                 |
|                                                                                                  | <b>Recognition of evidenced-based practices.</b> Medical science supports the efficacy and safety of vaccines. HCP who accept vaccines embody the prioritization of evidence-based practices over misinformation.                                                                                                                                                                                                                                                                                                                                                                                                                                                                                                                                                                                                                                                                                                                      | (58)                 |
|                                                                                                  | <b>Professional reputation.</b> HCPs may be perceived as representing others in the profession and of their entire institution. Just as professional behavior and appearance reflect well on the entire organization, the professionalism of HCP accepting vaccines may also enhance the positive regard for others in their role, their institution, and healthcare in general.                                                                                                                                                                                                                                                                                                                                                                                                                                                                                                                                                       | (59)                 |



Table 5. Strategies to Increase Vaccination Rates

| Study                        | Country   | Setting                                                                     | Ads/<br>Promo | Educational<br>Materials | Enhanced<br>Access | Incentives | Formal<br>Program<br>and/or<br>Leadership<br>Support | Data | Enforcement<br>and/or<br>Punitive Action | Mandatory<br>Declination | Mandatory<br>Masking | Post-<br>Intervention<br>Annual<br>Immunization<br>Rate (%) |
|------------------------------|-----------|-----------------------------------------------------------------------------|---------------|--------------------------|--------------------|------------|------------------------------------------------------|------|------------------------------------------|--------------------------|----------------------|-------------------------------------------------------------|
| Bennett, 2020 (60)           | Australia | Healthcare facilities (hospitals, ambulatory, skilled nursing facilities)   |               |                          |                    |            |                                                      | ✓    |                                          |                          |                      | 87.7                                                        |
| Drees, 2015 (61)             | US (DE)   | Academic health system (hospitals, ambulatory, home care)                   | ✓             | ✓                        | ✓                  | ✓          |                                                      | ✓    | ✓                                        | ✓                        | ✓                    | 92.4-93.5                                                   |
| Esolen, 2011 (62)            | US (PA)   | Academic health system (hospital, ambulatory, surgical center)              |               |                          | ✓                  |            | ✓                                                    | ✓    | ✓                                        |                          | ✓                    | 92-95                                                       |
| Esolen, 2014 (63)            | US (PA)   | Academic health system (hospital, ambulatory, surgical center)              | ✓             |                          | ✓                  |            | ✓                                                    | ✓    | ✓                                        |                          | ✓                    | 95-97                                                       |
| Fricke, 2013 (64)            | US (LA)   | Hospitals (public, private and academic)                                    | ✓             |                          | ✓                  |            |                                                      |      |                                          | ✓                        | ✓                    | 81-91                                                       |
| Frisina, 2019 (65)           | US (NJ)   | University health center (ambulatory)                                       | ✓             | ✓                        | ✓                  |            |                                                      |      |                                          |                          |                      | 91.1                                                        |
| Heinrich-Morrison, 2015 (66) | Australia | Health system (3 hospitals)                                                 | ✓             |                          | ✓                  | ✓          |                                                      | ✓    |                                          |                          |                      | 80.3                                                        |
| Honda, 2013 (67)             | Japan     | Academic hospital                                                           | ✓             |                          | ✓                  |            |                                                      | ✓    | ✓                                        | ✓                        |                      | 96.9                                                        |
| Jiang, 2018 (68)             | US (TN)   | Pediatric hospital                                                          |               | ✓                        | ✓                  |            | ✓                                                    | ✓    |                                          |                          |                      | 90                                                          |
| Jung, 2017 (69)              | Korea     | Academic hospital                                                           |               | ✓                        | ✓                  |            |                                                      |      | ✓                                        | ✓                        | ✓                    | 94.7                                                        |
| Kim, 2015 (70)               | US (RI)   | Healthcare facilities (hospitals, skilled nursing facilities, home care)    |               | ✓                        | ✓                  | ✓          |                                                      | ✓    | ✓                                        | ✓                        | ✓                    | 87.20                                                       |
| Ksienski, 2014 (71)          | Canada    | Healthcare facilities (hospital, long term care)                            |               |                          | ✓                  |            | ✓                                                    |      |                                          |                          | ✓                    | 74 (hospital), 75 (long-term care)                          |
| Marshall, 2019 (72)          | Australia | Academic health system (hospital, skilled nursing facility, long term care) | ✓             |                          | ✓                  |            | ✓                                                    | ✓    |                                          | ✓                        |                      | 78.6-82.4                                                   |
| McCullers, 2006 (73)         | US (TN)   | Academic pediatric hospital/research center (oncology)                      | ✓             | ✓                        | ✓                  |            | ✓                                                    | ✓    |                                          |                          |                      | 80 to 96                                                    |
| Modak, 2012 (74)             | US (VA)   | Academic hospital                                                           | ✓             | ✓                        | ✓                  |            |                                                      | ✓    | ✓                                        | ✓                        | ✓                    | 85                                                          |

|                          |            |                                                         |   |   |   |   |   |   |   |   |   |                                          |
|--------------------------|------------|---------------------------------------------------------|---|---|---|---|---|---|---|---|---|------------------------------------------|
| Palmore, 2009 (75)       | US (MD)    | Hospital (research center)                              | ✓ |   | ✓ |   | ✓ | ✓ | ✓ | ✓ |   | 88                                       |
| Perlin, 2013 (76)        | US (nat'l) | Health system (hospitals, ambulatory, surgical centers) | ✓ | ✓ |   |   | ✓ | ✓ | ✓ | ✓ | ✓ | 90.7 -94.7                               |
| Podczervinski, 2015 (77) | US (WA)    | Ambulatory (oncology research center)                   |   | ✓ | ✓ | ✓ |   |   | ✓ | ✓ |   | 92 (incentive-based), 96 (penalty-based) |

- Examples of enhanced access: Expanded hours of vaccination clinics to all shifts/days, mobile vaccination units, ability to report vaccination obtained outside of work place
- Examples of formal program and leadership support: Unit-based champions; peer vaccinators; institutional vaccination targets; participation of key opinion leaders and/or hospital leadership in vaccination campaign
- Examples of enforcement or punitive action: Badge marking of unvaccinated employees; mandatory education or counseling; disciplinary action; loss of eligibility for annual raises for non-compliance with mandatory masking or declination process
- Examples of mandatory masking: Unvaccinated employees required to mask when face-to-face contact with patient anticipated; during direct clinical care; when in clinical care area; when in facility

## References

1. CDC, NIOSH. Hierarchy of Controls 2015 [cited 2021 June]. Available from: <https://www.cdc.gov/niosh/topics/hierarchy/default.html>.
2. Polack FP, Thomas SJ, Kitchin N, Absalon J, Gurtman A, Lockhart S, et al. Safety and Efficacy of the BNT162b2 mRNA Covid-19 Vaccine. *N Engl J Med*. 2020;383(27):2603-15. Epub 2020/12/10. doi: 10.1056/NEJMoa2034577. PubMed PMID: 33301246; PubMed Central PMCID: PMC7745181.
3. Baden LR, El Sahly HM, Essink B, Kotloff K, Frey S, Novak R, et al. Efficacy and Safety of the mRNA-1273 SARS-CoV-2 Vaccine. *N Engl J Med*. 2021;384(5):403-16. Epub 2020/12/30. doi: 10.1056/NEJMoa2035389. PubMed PMID: 33378609; PubMed Central PMCID: PMC7787219.
4. Sadoff J, Gray G, Vandebosch A, Cárdenas V, Shukarev G, Grinsztejn B, et al. Safety and Efficacy of Single-Dose Ad26.COV2.S Vaccine against Covid-19. *N Engl J Med*. 2021;384(23):2187-201. Epub 2021/04/21. doi: 10.1056/NEJMoa2101544. PubMed PMID: 33882225.
5. Tang L, Hijano DR, Gaur AH, Geiger TL, Neufeld EJ, Hoffman JM, et al. Asymptomatic and Symptomatic SARS-CoV-2 Infections After BNT162b2 Vaccination in a Routinely Screened Workforce. *JAMA*. 2021;325(24):2500-2. doi: 10.1001/jama.2021.6564. PubMed PMID: 33956050.
6. Angel Y, Spitzer A, Henig O, Saiag E, Sprecher E, Padova H, et al. Association Between Vaccination With BNT162b2 and Incidence of Symptomatic and Asymptomatic SARS-CoV-2 Infections Among Health Care Workers. *JAMA*. 2021;325(24):2457-65. doi: 10.1001/jama.2021.7152. PubMed PMID: 33956048.
7. Hall VJ, Foulkes S, Saei A, Andrews N, Oguti B, Charlett A, et al. COVID-19 vaccine coverage in health-care workers in England and effectiveness of BNT162b2 mRNA vaccine against infection (SIREN): a prospective, multicentre, cohort study. *Lancet*. 2021;397(10286):1725-35. Epub 2021/04/23. doi: 10.1016/S0140-6736(21)00790-X. PubMed PMID: 33901423; PubMed Central PMCID: PMC8064668.
8. Swift MD, Breeher LE, Tande AJ, Tommaso CP, Hainy CM, Chu H, et al. Effectiveness of mRNA COVID-19 vaccines against SARS-CoV-2 infection in a cohort of healthcare personnel. *Clin Infect Dis*. 2021. Epub 2021/04/26. doi: 10.1093/cid/ciab361. PubMed PMID: 33900384; PubMed Central PMCID: PMC8135611.
9. Keehner J, Horton LE, Pfeiffer MA, Longhurst CA, Schooley RT, Currier JS, et al. SARS-CoV-2 Infection after Vaccination in Health Care Workers in California. *N Engl J Med*. 2021;384(18):1774-5. Epub 2021/03/23. doi: 10.1056/NEJMc2101927. PubMed PMID: 33755376; PubMed Central PMCID: PMC8008750.
10. Fabiani M, Ramigni M, Gobetto V, Mateo-Urdiales A, Pezzotti P, Piovesan C. Effectiveness of the Comirnaty (BNT162b2, BioNTech/Pfizer) vaccine in preventing SARS-CoV-2 infection among healthcare workers, Treviso province, Veneto region, Italy, 27 December 2020 to 24 March 2021. *Euro Surveill*. 2021;26(17). doi: 10.2807/1560-7917.ES.2021.26.17.2100420. PubMed PMID: 33928898; PubMed Central PMCID: PMC8086247.
11. Daniel W, Nivet M, Warner J, Podolsky DK. Early Evidence of the Effect of SARS-CoV-2 Vaccine at One Medical Center. *N Engl J Med*. 2021;384(20):1962-3. Epub 2021/03/23. doi: 10.1056/NEJMc2102153. PubMed PMID: 33755374; PubMed Central PMCID: PMC8008752.
12. Thompson MG, Burgess JL, Naleway AL, Tyner HL, Yoon SK, Meece J, et al. Interim Estimates of Vaccine Effectiveness of BNT162b2 and mRNA-1273 COVID-19 Vaccines in Preventing SARS-CoV-2 Infection Among Health Care Personnel, First Responders, and Other Essential and Frontline Workers - Eight U.S. Locations, December 2020-March 2021. *MMWR Morb Mortal Wkly Rep*. 2021;70(13):495-500. Epub 2021/04/02. doi: 10.15585/mmwr.mm7013e3. PubMed PMID: 33793460; PubMed Central PMCID: PMC8022879.
13. Pilishvili T, Fleming-Dutra KE, Farrar JL, Gierke R, Mohr NM, Talan DA, et al. Interim Estimates of Vaccine Effectiveness of Pfizer-BioNTech and Moderna COVID-19 Vaccines Among Health Care Personnel - 33 U.S. Sites, January-March 2021. *MMWR Morb Mortal Wkly Rep*. 2021;70(20):753-8. Epub 2021/05/21. doi: 10.15585/mmwr.mm7020e2. PubMed PMID: 34014909; PubMed Central PMCID: PMC8136422.
14. Haas EJ, Angulo FJ, McLaughlin JM, Anis E, Singer SR, Khan F, et al. Impact and effectiveness of mRNA BNT162b2 vaccine against SARS-CoV-2 infections and COVID-19 cases, hospitalisations, and deaths following a nationwide vaccination campaign in Israel: an observational study using national surveillance data. *Lancet*. 2021;397(10287):1819-29. Epub 2021/05/05. doi: 10.1016/S0140-6736(21)00947-8. PubMed PMID: 33964222; PubMed Central PMCID: PMC8099315.
15. Dagan N, Barda N, Kepten E, Miron O, Perchik S, Katz MA, et al. BNT162b2 mRNA Covid-19 Vaccine in a Nationwide Mass Vaccination Setting. *N Engl J Med*. 2021;384(15):1412-23. Epub 2021/02/24. doi: 10.1056/NEJMoa2101765. PubMed PMID: 33626250; PubMed Central PMCID: PMC7944975.
16. Chodick G, Tene L, Rotem RS, Patalon T, Gazit S, Ben-Tov A, et al. The effectiveness of the TWO-DOSE BNT162b2 vaccine: analysis of real-world data. *Clin Infect Dis*. 2021. Epub 2021/05/17. doi: 10.1093/cid/ciab438. PubMed PMID: 33999127.

17. Corchado-Garcia J, Puyraimond-Zemmour D, Hughes T, Cristea-Platon T, Lenehan P, Pawlowski C, et al. Real-world effectiveness of Ad26.COV2.S adenoviral vector vaccine for COVID-19. Epub April 30, 2021. doi: <https://doi.org/10.1101/2021.04.27.21256193>.
18. Lopez Bernal J, Andrews N, Gower C, Robertson C, Stowe J, Tessier E, et al. Effectiveness of the Pfizer-BioNTech and Oxford-AstraZeneca vaccines on covid-19 related symptoms, hospital admissions, and mortality in older adults in England: test negative case-control study. *BMJ*. 2021;373:n1088. Epub 2021/05/13. doi: 10.1136/bmj.n1088. PubMed PMID: 33985964; PubMed Central PMCID: PMC8116636.
19. Tenforde MW, Olson SM, Self WH, Talbot HK, Lindsell CJ, Steingrub JS, et al. Effectiveness of Pfizer-BioNTech and Moderna Vaccines Against COVID-19 Among Hospitalized Adults Aged  $\geq 65$  Years - United States, January-March 2021. *MMWR Morb Mortal Wkly Rep*. 2021;70(18):674-9. Epub 2021/05/07. doi: 10.15585/mmwr.mm7018e1. PubMed PMID: 33956782.
20. Britton A, Jacobs Slifka KM, Edens C, Nanduri SA, Bart SM, Shang N, et al. Effectiveness of the Pfizer-BioNTech COVID-19 Vaccine Among Residents of Two Skilled Nursing Facilities Experiencing COVID-19 Outbreaks - Connecticut, December 2020-February 2021. *MMWR Morb Mortal Wkly Rep*. 2021;70(11):396-401. Epub 2021/03/19. doi: 10.15585/mmwr.mm7011e3. PubMed PMID: 33735160; PubMed Central PMCID: PMC7976620.
21. Cavanaugh AM, Fortier S, Lewis P, Arora V, Johnson M, George K, et al. COVID-19 Outbreak Associated with a SARS-CoV-2 R.1 Lineage Variant in a Skilled Nursing Facility After Vaccination Program - Kentucky, March 2021. *MMWR Morb Mortal Wkly Rep*. 2021;70(17):639-43. Epub 2021/04/30. doi: 10.15585/mmwr.mm7017e2. PubMed PMID: 33914720; PubMed Central PMCID: PMC8084128.
22. Abu-Raddad LJ, Chemaitelly H, Butt AA, Vaccination NSGfC-. Effectiveness of the BNT162b2 Covid-19 Vaccine against the B.1.1.7 and B.1.351 Variants. *N Engl J Med*. 2021. Epub 2021/05/05. doi: 10.1056/NEJMc2104974. PubMed PMID: 33951357; PubMed Central PMCID: PMC8117967.
23. Sheikh A, McMenamin J, Taylor B, Robertson C, Collaborators PHSatEI. SARS-CoV-2 Delta VOC in Scotland: demographics, risk of hospital admission, and vaccine effectiveness. *Lancet*. 2021;397(10293):2461-2. Epub 2021/06/14. doi: 10.1016/S0140-6736(21)01358-1. PubMed PMID: 34139198; PubMed Central PMCID: PMC8201647.
24. Shimabukuro T, editor COVID-19 vaccine post-authorization safety monitoring update. ACIP; 2020 December 2020. Centers for Disease Control and Prevention: CDC.gov; 2020.
25. Ellsworth M, Chang M, Ostrosky-Zeichner L. Mind the gap: The hospital breakroom. *Am J Infect Control*. 2020;48(10):1285. Epub 2020/06/17. doi: 10.1016/j.ajic.2020.06.179. PubMed PMID: 32562713; PubMed Central PMCID: PMC7832819.
26. Çelebi G, Pişkin N, Çelik Bekleviç A, Altunay Y, Salcı Keleş A, Tüz MA, et al. Specific risk factors for SARS-CoV-2 transmission among health care workers in a university hospital. *Am J Infect Control*. 2020;48(10):1225-30. Epub 2020/08/06. doi: 10.1016/j.ajic.2020.07.039. PubMed PMID: 32771498; PubMed Central PMCID: PMC7409872.
27. Haessler S. Anatomy of a COVID-19 Outbreak: Society for Healthcare Epidemiology of America (SHEA); 2020.
28. Brandt MP, Jäger W, Epple S, Haferkamp A, Schröder A. SARS-CoV-2 outbreak in medical employees in a large urologic department: Spread, containment and outcome. *Am J Infect Control*. 2021;49(6):674-7. Epub 2021/02/19. doi: 10.1016/j.ajic.2021.02.011. PubMed PMID: 33617920; PubMed Central PMCID: PMC7894092.
29. Schneider S, Piening B, Nouri-Pasovsky PA, Krüger AC, Gastmeier P, Aghdassi SJS. SARS-Coronavirus-2 cases in healthcare workers may not regularly originate from patient care: lessons from a university hospital on the underestimated risk of healthcare worker to healthcare worker transmission. *Antimicrob Resist Infect Control*. 2020;9(1):192. Epub 2020/12/07. doi: 10.1186/s13756-020-00848-w. PubMed PMID: 33287908; PubMed Central PMCID: PMC7719852.
30. Baker MA, Fiumara K, Rhee C, Williams SA, Tucker R, Wickner P, et al. Low risk of COVID-19 among patients exposed to infected healthcare workers. *Clin Infect Dis*. 2020. Epub 2020/08/28. doi: 10.1093/cid/ciaa1269. PubMed PMID: 32856692; PubMed Central PMCID: PMC7499548.
31. Rhee C, Baker M, Vaidya V, Tucker R, Resnick A, Morris CA, et al. Incidence of Nosocomial COVID-19 in Patients Hospitalized at a Large US Academic Medical Center. *JAMA Netw Open*. 2020;3(9):e2020498. Epub 2020/09/01. doi: 10.1001/jamanetworkopen.2020.20498. PubMed PMID: 32902653; PubMed Central PMCID: PMC7489854.
32. Shah A, Gribben C, Bishop J, Hanlon P, Caldwell D, Wood R, et al. Effect of vaccination on transmission of COVID-19: an observational study in healthcare workers and their households. Available from: <https://www.medrxiv.org/content/10.1101/2021.03.11.21253275v1>.

33. Heinzerling A, Stuckey MJ, Scheuer T, Xu K, Perkins KM, Resseger H, et al. Transmission of COVID-19 to Health Care Personnel During Exposures to a Hospitalized Patient - Solano County, California, February 2020. *MMWR Morb Mortal Wkly Rep.* 2020;69(15):472-6. Epub 2020/04/17. doi: 10.15585/mmwr.mm6915e5. PubMed PMID: 32298249.
34. Ghinai I, McPherson TD, Hunter JC, Kirking HL, Christiansen D, Joshi K, et al. First known person-to-person transmission of severe acute respiratory syndrome coronavirus 2 (SARS-CoV-2) in the USA. *Lancet.* 2020;395(10230):1137-44. Epub 2020/03/13. doi: 10.1016/S0140-6736(20)30607-3. PubMed PMID: 32178768; PubMed Central PMCID: PMC7158585.
35. Cheng HY, Jian SW, Liu DP, Ng TC, Huang WT, Lin HH, et al. Contact Tracing Assessment of COVID-19 Transmission Dynamics in Taiwan and Risk at Different Exposure Periods Before and After Symptom Onset. *JAMA Intern Med.* 2020;180(9):1156-63. doi: 10.1001/jamainternmed.2020.2020. PubMed PMID: 32356867; PubMed Central PMCID: PMC7195694.
36. Klompas M, Baker MA, Rhee C, Tucker R, Fiumara K, Griesbach D, et al. A SARS-CoV-2 Cluster in an Acute Care Hospital. *Ann Intern Med.* 2021;174(6):794-802. Epub 2021/02/09. doi: 10.7326/M20-7567. PubMed PMID: 33556277; PubMed Central PMCID: PMC7924623.
37. CDC, NCIRD. Interim Infection Prevention and Control Recommendations to Prevent SARS-CoV-2 Spread in Nursing Homes: CDC.gov; 2021 [updated March 29, 2021; cited 2021 June]. Available from: <https://www.cdc.gov/coronavirus/2019-ncov/hcp/long-term-care.html>.
38. CMS. Nursing Home Visitation - COVID-19 (REVISED). Posted March 20, 2021 ed. Baltimore, MD: CMS.gov; 2021.
39. Agronin M. The Impact of COVID-19 on Mental Health in Long-Term Care Settings. *Psychiatric Times* [Internet]. Available from: <https://www.psychiatrictimes.com/view/the-impact-of-covid-19-on-mental-health-in-long-term-care-settings>.
40. Krammer F, Srivastava K, Alshammary H, Amoako AA, Awawda MH, Beach KF, et al. Antibody Responses in Seropositive Persons after a Single Dose of SARS-CoV-2 mRNA Vaccine. *N Engl J Med.* 2021;384(14):1372-4. Epub 2021/03/10. doi: 10.1056/NEJMc2101667. PubMed PMID: 33691060; PubMed Central PMCID: PMC8008743.
41. Benenson S, Oster Y, Cohen MJ, Nir-Paz R. BNT162b2 mRNA Covid-19 Vaccine Effectiveness among Health Care Workers. *N Engl J Med.* 2021;384(18):1775-7. Epub 2021/03/23. doi: 10.1056/NEJMc2101951. PubMed PMID: 33755373; PubMed Central PMCID: PMC8008751.
42. Amit S, Regev-Yochay G, Afek A, Kreiss Y, Leshem E. Early rate reductions of SARS-CoV-2 infection and COVID-19 in BNT162b2 vaccine recipients. *Lancet.* 2021;397(10277):875-7. Epub 2021/02/18. doi: 10.1016/S0140-6736(21)00448-7. PubMed PMID: 33610193; PubMed Central PMCID: PMC7906709.
43. Hughes MM, Groenewold MR, Lessem SE, Xu K, Ussery EN, Wiegand RE, et al. Update: Characteristics of Health Care Personnel with COVID-19 - United States, February 12-July 16, 2020. *MMWR Morb Mortal Wkly Rep.* 2020;69(38):1364-8. Epub 2020/09/25. doi: 10.15585/mmwr.mm6938a3. PubMed PMID: 32970661; PubMed Central PMCID: PMC7727493.
44. Bandyopadhyay S, Baticulon RE, Kadhum M, Alser M, Ojuka DK, Badereddin Y, et al. Infection and mortality of healthcare workers worldwide from COVID-19: a systematic review. *BMJ Glob Health.* 2020;5(12). doi: 10.1136/bmjgh-2020-003097. PubMed PMID: 33277297; PubMed Central PMCID: PMC7722361.
45. Eftekhari Ardebili M, Naserbakht M, Bernstein C, Alazmani-Noodeh F, Hakimi H, Ranjbar H. Healthcare providers experience of working during the COVID-19 pandemic: A qualitative study. *Am J Infect Control.* 2021;49(5):547-54. Epub 2020/10/06. doi: 10.1016/j.ajic.2020.10.001. PubMed PMID: 33031864; PubMed Central PMCID: PMC7536124.
46. Kuster SP, Böni J, Kouyos RD, Huber M, Schmutz S, Shah C, et al. Absenteeism and presenteeism in healthcare workers due to respiratory illness. *Infect Control Hosp Epidemiol.* 2021;42(3):268-73. Epub 2020/11/26. doi: 10.1017/ice.2020.444. PubMed PMID: 33239124.
47. Xu H, Intrator O, Bowblis JR. Shortages of Staff in Nursing Homes During the COVID-19 Pandemic: What are the Driving Factors? *J Am Med Dir Assoc.* 2020;21(10):1371-7. Epub 2020/08/11. doi: 10.1016/j.jamda.2020.08.002. PubMed PMID: 32981663; PubMed Central PMCID: PMC7418696.
48. Groenewold MR, Burrer SL, Ahmed F, Uzicanin A, Free H, Luckhaupt SE. Increases in Health-Related Workplace Absenteeism Among Workers in Essential Critical Infrastructure Occupations During the COVID-19 Pandemic - United States, March-April 2020. *MMWR Morb Mortal Wkly Rep.* 2020;69(27):853-8. Epub 2020/07/10. doi: 10.15585/mmwr.mm6927a1. PubMed PMID: 32644979; PubMed Central PMCID: PMC7727595.

49. Von Batten K, York M. The First 100 Days: The Effects of the COVID-19 Pandemic on Healthcare Workers' Efficacy and Absenteeism in the United States and the United Kingdom. SSRN. 2020. Epub May 11, 2020. doi: <http://dx.doi.org/10.2139/ssrn.3633537>.
50. Gur-Arie R, Katz MA, Hirsch A, Greenberg D, Malosh R, Neues-Adeyi G, et al. "You Have to Die Not to Come to Work": A Mixed Methods Study of Attitudes and Behaviors regarding Presenteeism, Absenteeism and Influenza Vaccination among Healthcare Personnel with Respiratory Illness in Israel, 2016-2019. *Vaccine*. 2021;39(17):2366-74. Epub 2021/03/29. doi: 10.1016/j.vaccine.2021.03.057. PubMed PMID: 33789798.
51. CDC. Updated Healthcare Infection Prevention and Control Recommendations in Response to COVID-19 Vaccination. In: NCIRD, editor. 2021.
52. Breeher L, Boon A, Hainy C, Murad MH, Wittich C, Swift M. A Framework for Sustainable Contact Tracing and Exposure Investigation for Large Health Systems. *Mayo Clin Proc*. 2020;95(7):1432-44. Epub 2020/06/16. doi: 10.1016/j.mayocp.2020.05.008. PubMed PMID: 32561146; PubMed Central PMCID: PMC7832466.
53. Heesakkers H, Zegers M, van Mol MMC, van den Boogaard M. The impact of the first COVID-19 surge on the mental well-being of ICU nurses: A nationwide survey study. *Intensive Crit Care Nurs*. 2021;65:103034. Epub 2021/03/20. doi: 10.1016/j.iccn.2021.103034. PubMed PMID: 33863609.
54. Borah P, Hwang J. Trust in Doctors, Positive Attitudes, and Vaccination Behavior: The Role of Doctor-Patient Communication in H1N1 Vaccination. *Health Commun*. 2021:1-9. Epub 2021/03/09. doi: 10.1080/10410236.2021.1895426. PubMed PMID: 33685304.
55. Shekhar R, Sheikh AB, Upadhyay S, Singh M, Kottewar S, Mir H, et al. COVID-19 Vaccine Acceptance among Health Care Workers in the United States. *Vaccines (Basel)*. 2021;9(2). Epub 2021/02/03. doi: 10.3390/vaccines9020119. PubMed PMID: 33546165; PubMed Central PMCID: PMC7913135.
56. Altman D. Why Doctors and Nurses Can Be Vital Vaccine Messengers. Kaiser Family Foundation: Coronavirus (COVID-19) [Internet]. 2021. Available from: <https://www.kff.org/coronavirus-covid-19/perspective/why-doctors-and-nurses-can-be-vital-vaccine-messengers/>.
57. Ahmed F, Lindley MC, Allred N, Weinbaum CM, Grohskopf L. Effect of influenza vaccination of healthcare personnel on morbidity and mortality among patients: systematic review and grading of evidence. *Clin Infect Dis*. 2014;58(1):50-7. Epub 2013/09/17. doi: 10.1093/cid/cit580. PubMed PMID: 24046301.
58. Finney Rutten LJ, Zhu X, Leppin AL, Ridgeway JL, Swift MD, Griffin JM, et al. Evidence-Based Strategies for Clinical Organizations to Address COVID-19 Vaccine Hesitancy. *Mayo Clin Proc*. 2021;96(3):699-707. Epub 2020/12/30. doi: 10.1016/j.mayocp.2020.12.024. PubMed PMID: 33673921; PubMed Central PMCID: PMC7772995.
59. IAC. Influenza Vaccination Honor Roll: Mandatory Influenza Vaccination for Healthcare Personnel St. Paul, MN [cited 2021 June]. Available from: <https://www.immunize.org/honor-roll/influenza-mandates/>.
60. Bennett N, Crouch S, Hoskins A, Malloy MJ, Walker K, Worth LJ. 'Closing the gap': Evaluating the success of non-mandatory strategies for influenza vaccination of Victorian healthcare workers. *Vaccine*. 2020;38(41):6363-6. Epub 2020/08/12. doi: 10.1016/j.vaccine.2020.08.013. PubMed PMID: 32800466.
61. Drees M, Wroten K, Smedley M, Mase T, Schwartz JS. Carrots and sticks: achieving high healthcare personnel influenza vaccination rates without a mandate. *Infect Control Hosp Epidemiol*. 2015;36(6):717-24. Epub 2015/02/27. doi: 10.1017/ice.2015.47. PubMed PMID: 25721404.
62. Esolen LM, Kilheeny KL, Merkle RE, Bothe A. An alternate approach to improving healthcare worker influenza vaccination rates. *Infect Control Hosp Epidemiol*. 2011;32(7):703-5. doi: 10.1086/660762. PubMed PMID: 21666402.
63. Esolen LM, Kilheeny KL. Sustaining high influenza vaccination compliance with a mandatory masking program. *Infect Control Hosp Epidemiol*. 2014;35(5):603-4. doi: 10.1086/675846. PubMed PMID: 24709741.
64. Fricke KL, Gastañaduy MM, Klos R, Bégué RE. Correlates of improved influenza vaccination of healthcare personnel: a survey of hospitals in Louisiana. *Infect Control Hosp Epidemiol*. 2013;34(7):723-9. Epub 2013/05/22. doi: 10.1086/670992. PubMed PMID: 23739077.
65. Frisina PG, Ingrassia ST, Brown TR, Munene EN, Pletcher JR, Kolligian J. Increasing influenza immunization rates among healthcare providers in an ambulatory-based, University Healthcare Setting☆. *Int J Qual Health Care*. 2019;31(9):698-703. doi: 10.1093/intqhc/mzy247. PubMed PMID: 30624657.
66. Heinrich-Morrison K, McLellan S, McGinnes U, Carroll B, Watson K, Bass P, et al. An effective strategy for influenza vaccination of healthcare workers in Australia: experience at a large health service without a mandatory policy. *BMC Infect Dis*. 2015;15:42. Epub 2015/02/06. doi: 10.1186/s12879-015-0765-7. PubMed PMID: 25656220; PubMed Central PMCID: PMC4328539.

67. Honda H, Sato Y, Yamazaki A, Padival S, Kumagai A, Babcock H. A successful strategy for increasing the influenza vaccination rate of healthcare workers without a mandatory policy outside of the United States: a multifaceted intervention in a Japanese tertiary care center. *Infect Control Hosp Epidemiol.* 2013;34(11):1194-200. Epub 2013/09/19. doi: 10.1086/673452. PubMed PMID: 24113604.
68. Jiang C, Whitmore-Sisco L, Gaur AH, Adderson EE, Group TW. A quality improvement initiative to increase Tdap (tetanus, diphtheria, acellular pertussis) vaccination coverage among direct health care providers at a children's hospital. *Vaccine.* 2018;36(2):214-9. Epub 2017/12/06. doi: 10.1016/j.vaccine.2017.11.071. PubMed PMID: 29217370.
69. Jung Y, Kwon M, Song J. Stepwise intervention including 1-on-1 counseling is highly effective in increasing influenza vaccination among health care workers. *Am J Infect Control.* 2017;45(6):635-41. Epub 2017/01/04. doi: 10.1016/j.ajic.2016.11.012. PubMed PMID: 28063732.
70. Kim H, Lindley MC, Dube D, Kalayil EJ, Paiva KA, Raymond P. Evaluation of the impact of the 2012 Rhode Island health care worker influenza vaccination regulations: implementation process and vaccination coverage. *J Public Health Manag Pract.* 2015;21(3):E1-9. doi: 10.1097/PHH.000000000000128. PubMed PMID: 25105280; PubMed Central PMCID: PMC4736136.
71. Ksienski DS. Mandatory seasonal influenza vaccination or masking of British Columbia health care workers: Year 1. *Can J Public Health.* 2014;105(4):e312-6. Epub 2014/07/11. doi: 10.17269/cjph.105.4346. PubMed PMID: 25166135; PubMed Central PMCID: PMC6972449.
72. Marshall C, Williams K, Matchett E, Hobbs L. Sustained improvement in staff influenza vaccination rates over six years without a mandatory policy. *Infect Control Hosp Epidemiol.* 2019;40(3):389-90. Epub 2019/02/15. doi: 10.1017/ice.2018.365. PubMed PMID: 30767814.
73. McCullers JA, Speck KM, Williams BF, Liang H, Mirro J. Increased influenza vaccination of healthcare workers at a pediatric cancer hospital: results of a comprehensive influenza vaccination campaign. *Infect Control Hosp Epidemiol.* 2006;27(1):77-9. Epub 2006/01/06. doi: 10.1086/500003. PubMed PMID: 16418993.
74. Modak RM, Parris SM, Dilisi JP, Premkumar A. Increasing influenza vaccination rates among hospital employees without a mandatory policy. *Infect Control Hosp Epidemiol.* 2012;33(12):1288-9. doi: 10.1086/667384. PubMed PMID: 23143379.
75. Palmore TN, Vandersluis JP, Morris J, Michelin A, Ruprecht LM, Schmitt JM, et al. A successful mandatory influenza vaccination campaign using an innovative electronic tracking system. *Infect Control Hosp Epidemiol.* 2009;30(12):1137-42. doi: 10.1086/648084. PubMed PMID: 19860562.
76. Perlin JB, Septimus EJ, Cormier SB, Moody JA, Hickok JD, Bracken RM. Developing a program to increase seasonal influenza vaccination of healthcare workers: lessons from a system of community hospitals. *J Healthc Qual.* 2013;35(6):5-15. Epub 2013/03/07. doi: 10.1111/jhq.12005. PubMed PMID: 23470232.
77. Podczervinski S, Stednick Z, Helbert L, Davies J, Jagels B, Gooley T, et al. Employee influenza vaccination in a large cancer center with high baseline compliance rates: comparison of carrot versus stick approaches. *Am J Infect Control.* 2015;43(3):228-33. doi: 10.1016/j.ajic.2014.11.025. PubMed PMID: 25728148; PubMed Central PMCID: PMC4372134.
